# Supplementary material for: Polyelectrolyte stabilized bi-metallic Au/Ag nanoclusters modified electrode for nitric oxide detection
Source: Royal Society of Chemistry journal article supplement (doi:10.1039/c5ra06098b), 2015-01-01
Supplement: c5ra06098b1.pdf [file c5ra06098b1.pdf]

## Supporting Information

**Manuscript Title:**

**Polyelectrolyte Stabilized Bi-Metallic Au/Ag Nanoclusters Modified Electrodes for Nitric Oxide Detection**

**Authors:** Perumal Viswanathan, Shanmugam Manivannan and Ramasamy Ramaraj\*

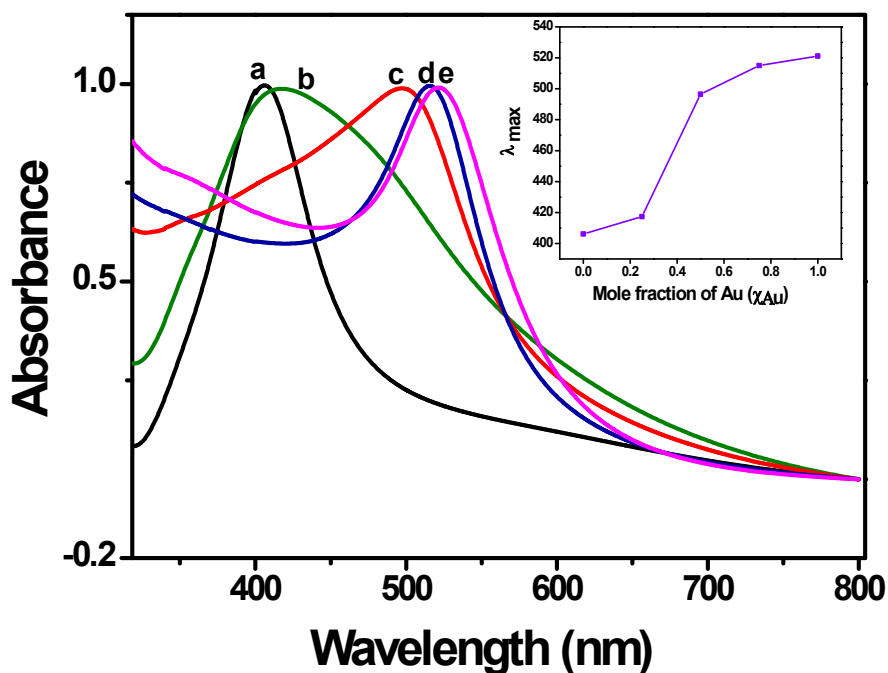

**Fig. S1.** Normalised UV-vis absorption spectra of PADA–Ag NPs (a), PADA–Au<sub>25</sub>Ag<sub>75</sub> NCs (b), PADA–Au<sub>50</sub>Ag<sub>50</sub> NCs (c), PADA–Au<sub>75</sub>Ag<sub>25</sub> NCs (d) and PADA–Au NPs (e) solutions. Inset shows the plot of absorption maximum against Au mole fraction.

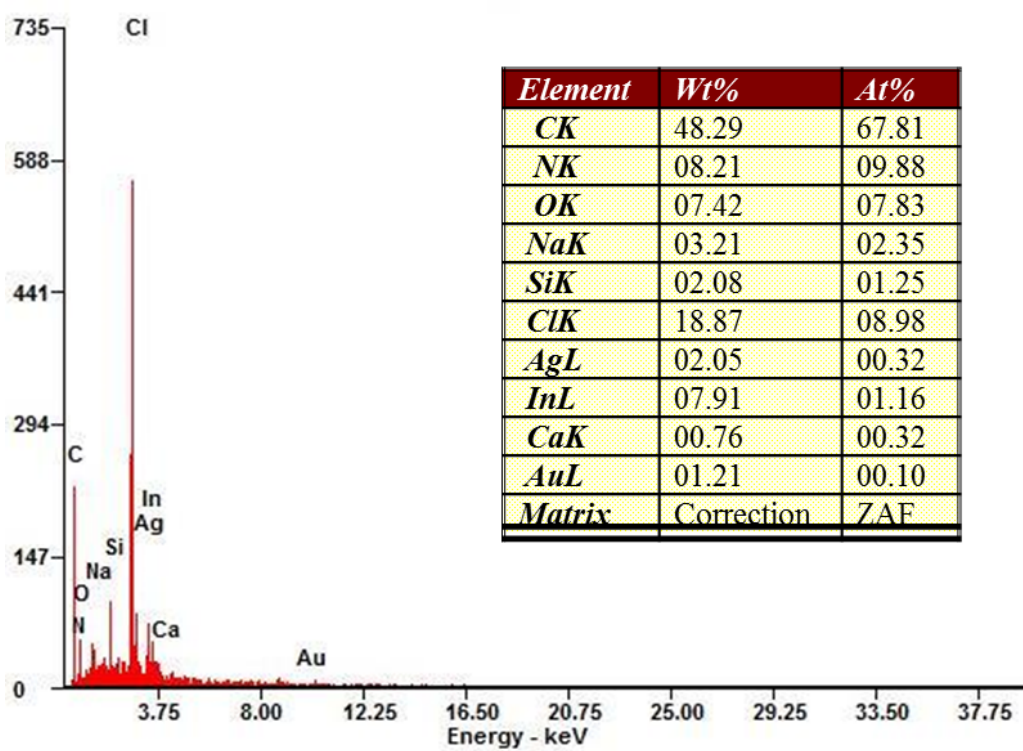

**Figure S2.** EDX spectrum of PADA-Au<sub>25</sub>Ag<sub>75</sub> NCs.

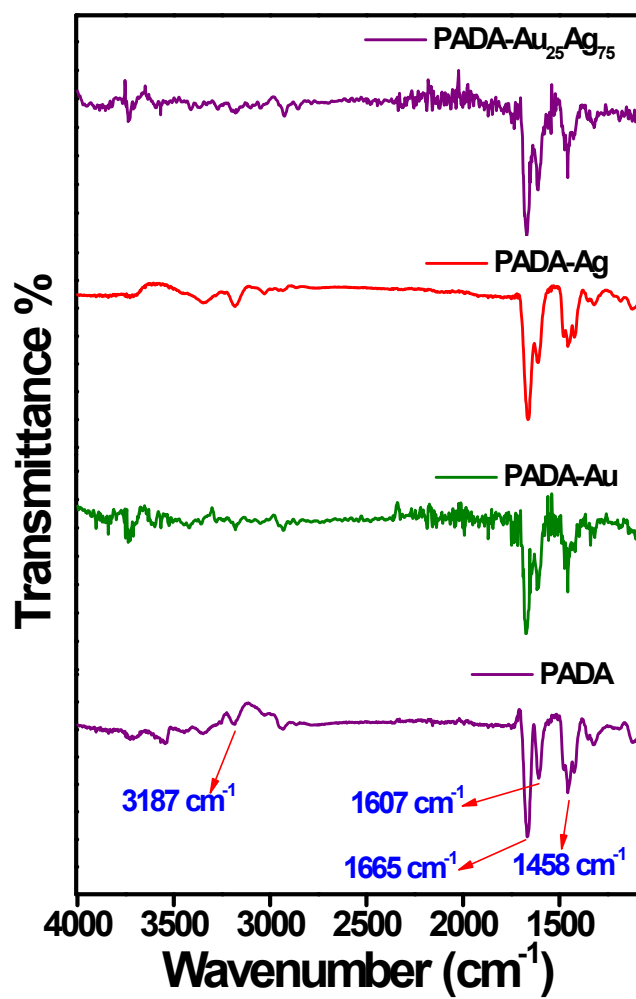

**Figure S3.** FT-IR spectra recorded for the PADA and PADA stabilized mono- and bi-metallic nanostructures.

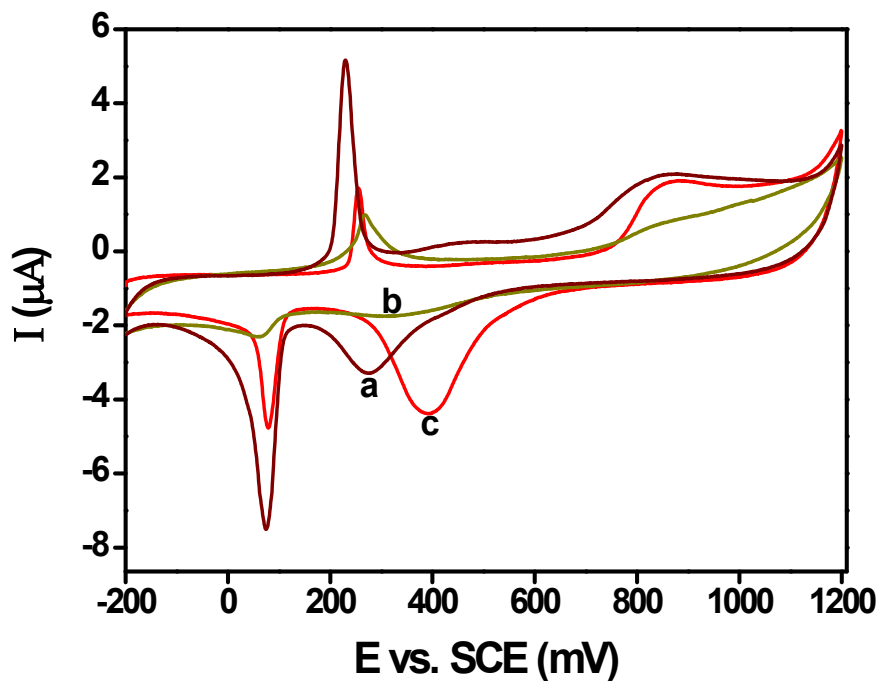

Fig

. S4. Cyclic voltammograms recorded for GC/PADA–Au<sub>25</sub>/Ag<sub>75</sub> (a), GC/PADA–Au<sub>50</sub>/Ag<sub>50</sub> (b) and GC/PADA–Au<sub>75</sub>/Ag<sub>25</sub> (c) NCs modified electrodes in 0.1 M PBS at a scan rate of 50 mV/s.

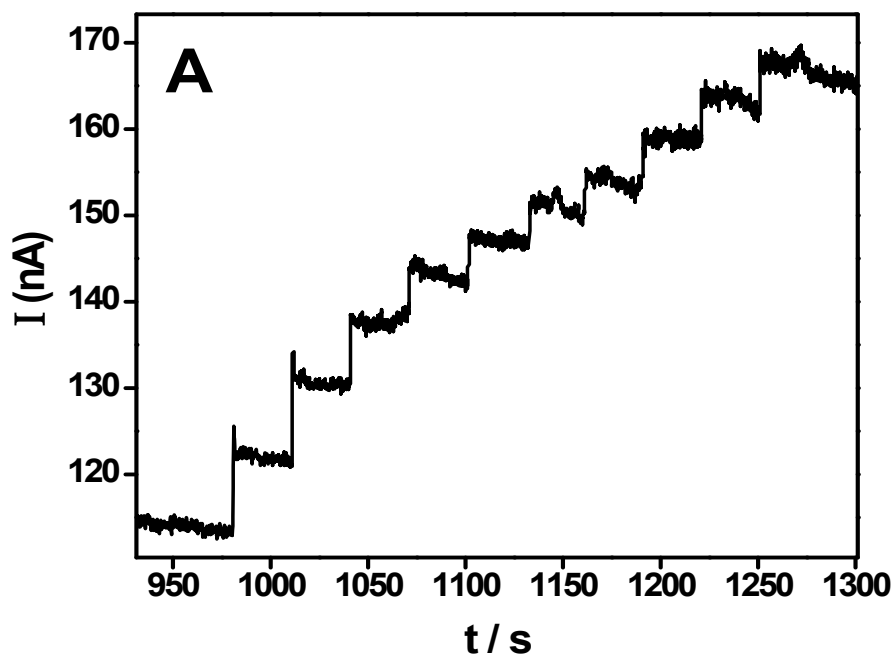

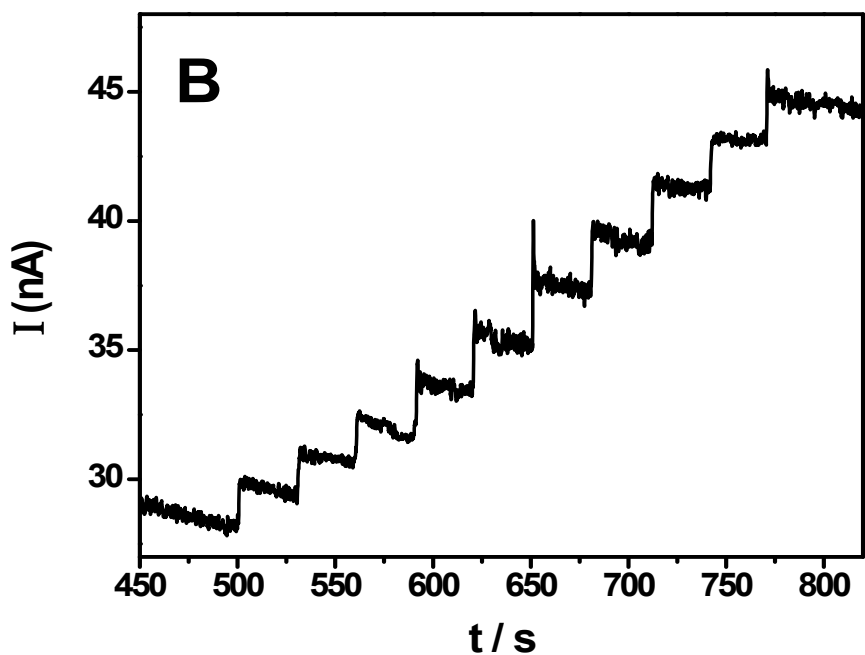

**Fig. S5.** Amperometric  $i-t$  curve obtained at GC/PADA-Ag (A) and GC/PADA-Au (B) NPs modified electrode during the successive addition of 10 nM NO to a stirred solution of 0.1 M PBS (pH 7.2) at an applied potential of 0.9 V.

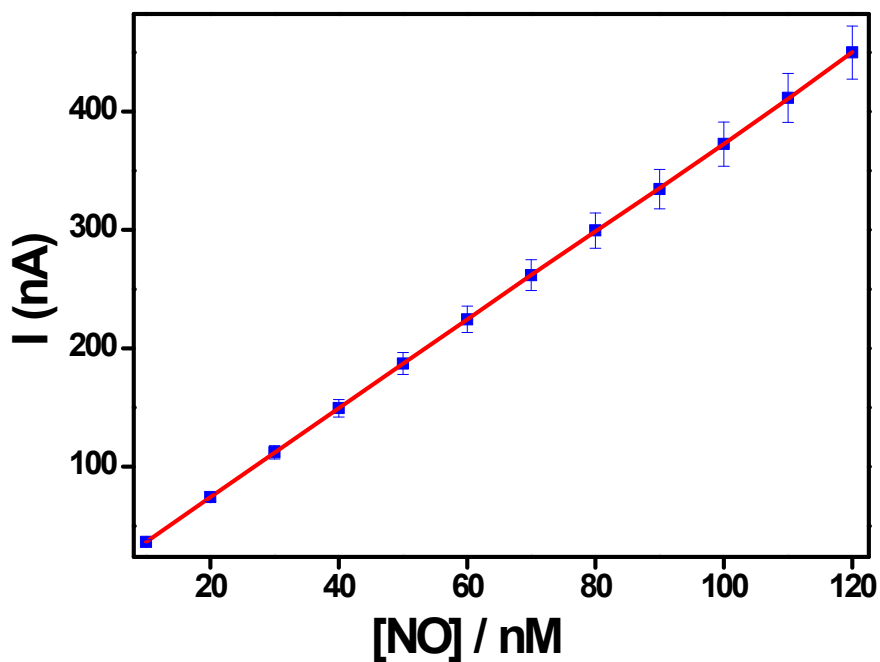

**Fig. S6.** Calibration plot of current versus NO concentration obtained for GC/PADA-Au<sub>25</sub>/Ag<sub>75</sub> NCs modified electrode.
